# Supplementary material for: Overlapping ETS and CRE Motifs (G/CCGGAAGTGACGTCA) Preferentially Bound by GABPα and CREB Proteins
Source: PubMed Central journal article supplement (PMC3464117; doi:10.1534/g3.112.004002), 2012-10-01
Supplement: supp_2.10.1243_004002SI.pdf [file supp_2.10.1243_004002SI.pdf]

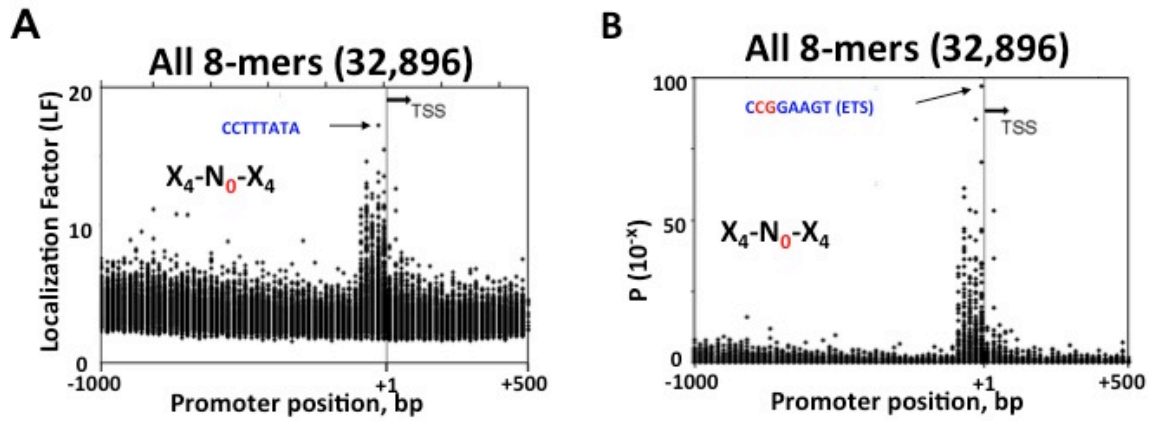

**Figure S1** Localization of 8-mers in human promoters. **A)** Localization Factor (LF), a measure of non-random distribution of a DNA sequence, for 32,896 continuous 8-mers ( $X_4-N_0-X_4$ ). For each 8-mer, the distribution in 17,143 human promoters (-1,000 bp to +500 bp) aligned relative to the TSS was determined and plotted in the most abundant 20 bp bin. Some sequences are preferentially localized near the TSS. **B)** Probability ( $p=10^{-x}$ ) that an 8-mer have a non-random distribution is plotted in the most abundant bin for all 8-mers.

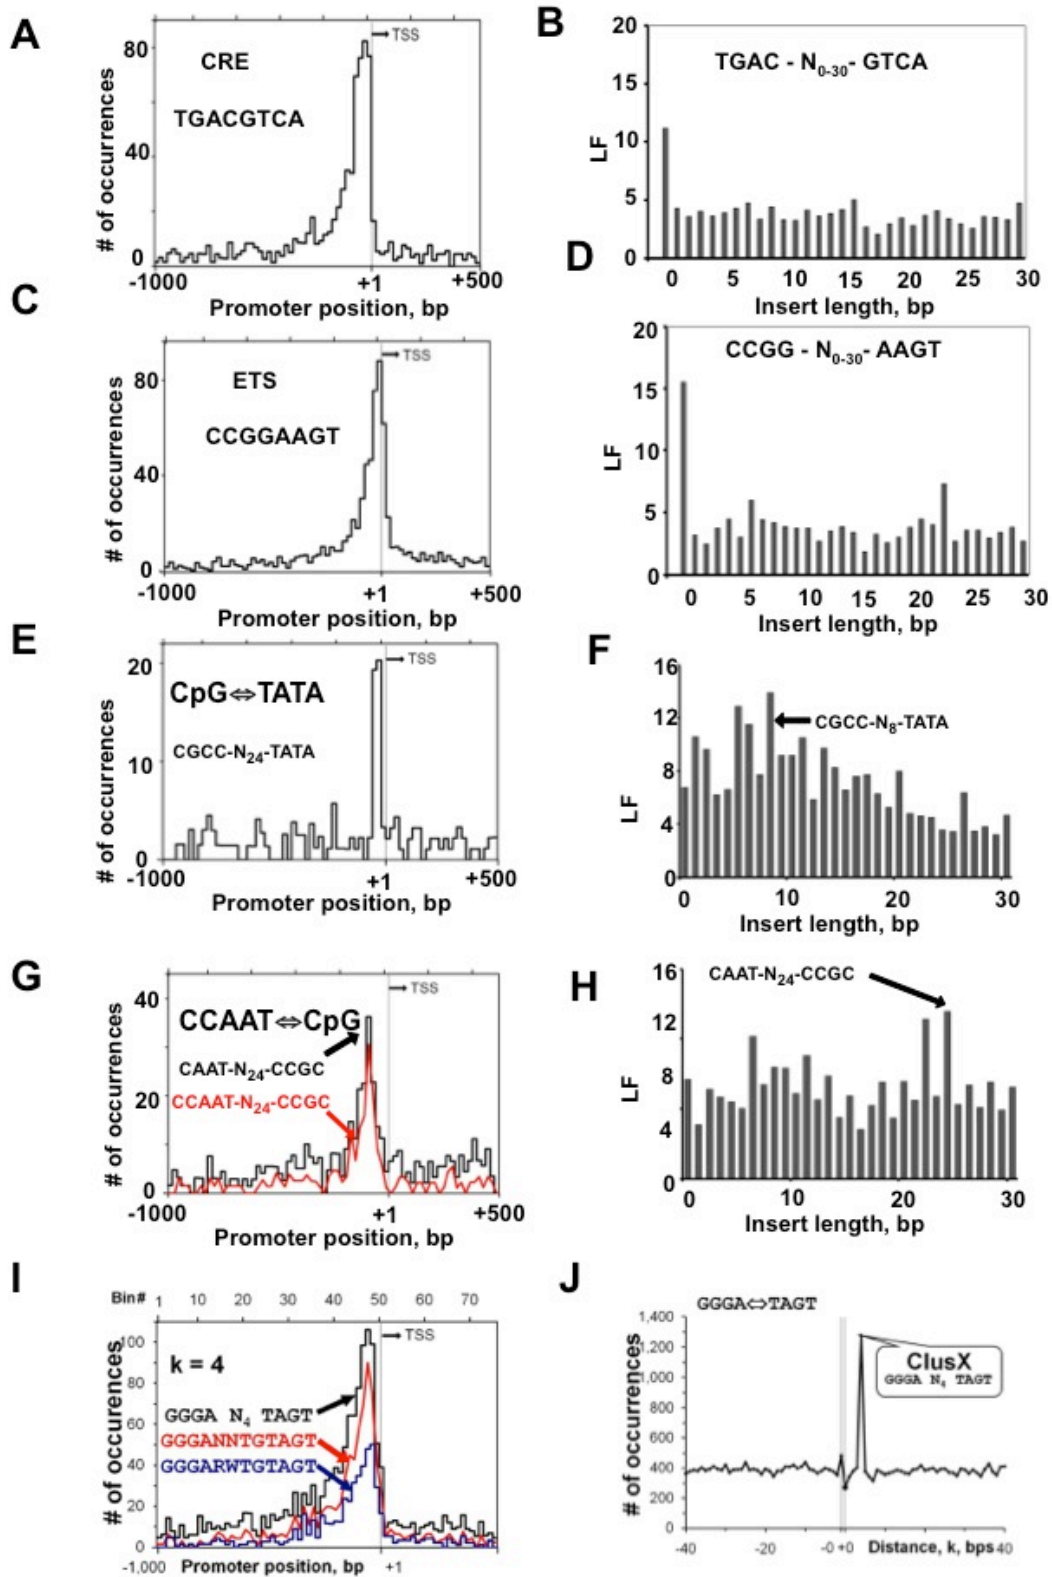

**Figure S2** **A**) Distribution of the CRE 8-mer TGACGTCA in human promoters. **B**) LF for CRE 8-mer with insert length ranging from 0-bps to 30-bps (TGAC-N<sub>0-30</sub>-GTCA). **C**) Distribution of the ETS TFBS (CCGGAAGT) in promoters counting occurrence in 20 bp bins. **D**) LF for ETS 8-mer (CCGG-N<sub>0-30</sub>-AAGT) with insert length ranging from 0-bps to 30-bps. The 8-mer CCGGAAGT preferentially localizes in promoters when the two 4-mers are abutted. High LF values are also observed at additional insert

length, including CCGG-N<sub>6</sub>-AAGT, which represents the ETS $\leftrightarrow$ ETS motif and CCGG-N<sub>23</sub>-AAGT. **E)** Distribution of the split 8-mer CGCC-N<sub>24</sub>-TATA in promoters. **F)** LF for CGCC-N<sub>0-30</sub>-TATA with insert length ranging from 0-bps to 30-bps. **G)** Distribution of the split 8-mer CAAT-N<sub>24</sub>-CCGC in human promoters. The most localizing motif is the split 9-mer CCAAT-N<sub>24</sub>-CCGC marked in red. **H)** LF for CAAT-N<sub>0-30</sub>-CCGC with insert length from 0-bps to 30-bps. **I)** Distribution of the split 8-mer GGGA-N<sub>4</sub>-TAGT and more localizing split 10-mer GGGA-N<sub>2</sub>-TGTAGT. **J)** Occurrences of split 8-mer GGGA-N<sub>0-40</sub>-TAGT with insert length ranging from 0-bps to 40-bps. The reverse order of the two 4-mers TAGT-N<sub>0-40</sub>-GGGA is shown with negative values.

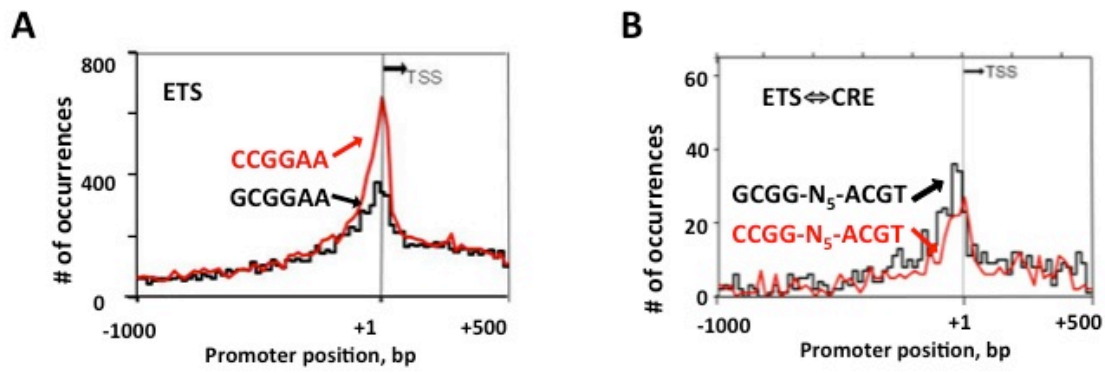

### C DNA surrounding the ETS $\leftrightarrow$ CRE 11-mers

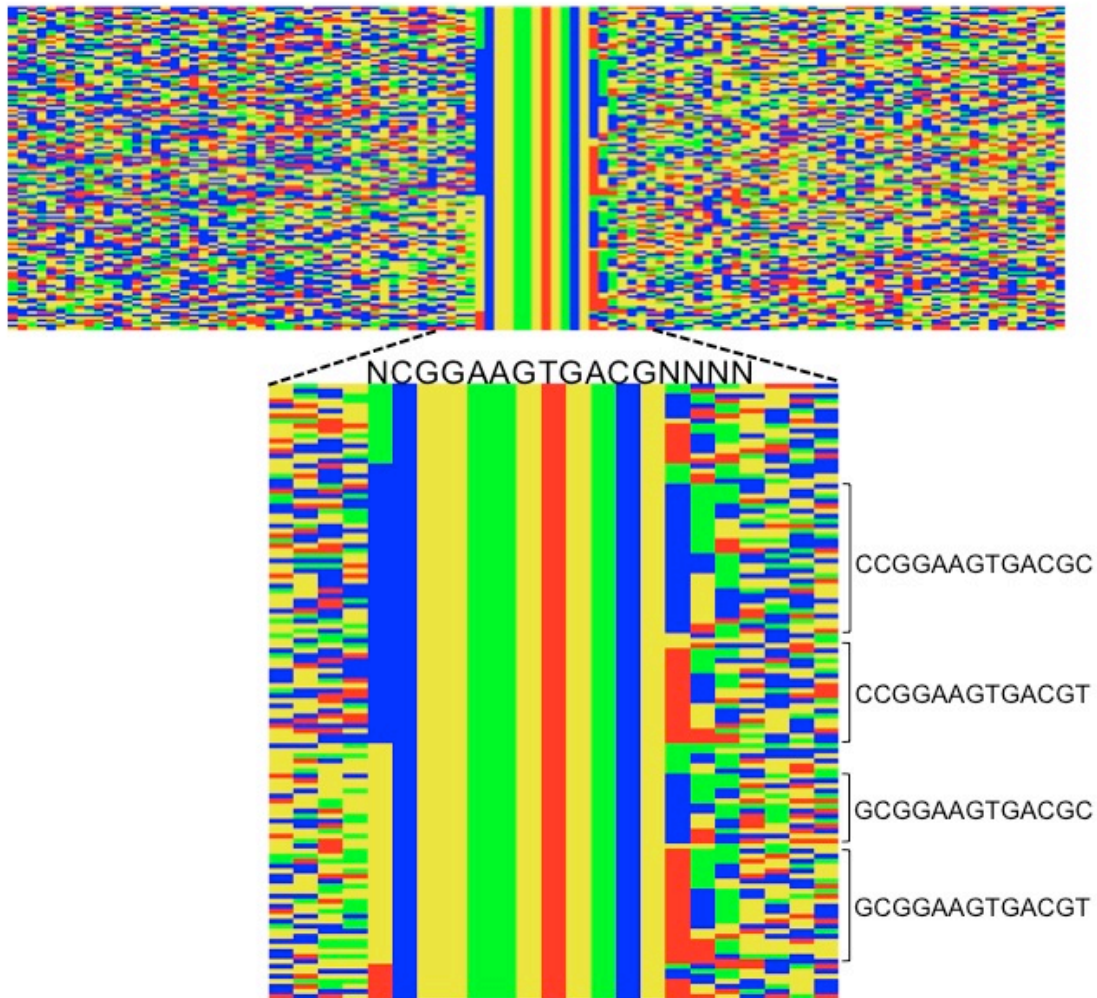

**Figure S3** **A)** Distribution of the two ETS TFBS (CCGGAA and GCGGAA). **B)** Distribution of the two split 8-mers GCGG-N<sub>5</sub>-ACGT and CCGG-N<sub>5</sub>-ACGT representing the ETS $\leftrightarrow$ CRE motif. **C)** Color representation of the sequences surrounding the 134 ETS $\leftrightarrow$ CRE 11-mers that occur in housekeeping DHSs with C=blue, G=yellow, A=green and T=red. The core part of the ETS $\leftrightarrow$ CRE motif is shown in inset. Sequences were grouped based on the nucleotides as shown by numbers in bold: **1**CGGAAGTGACG**2345** where the numbers represent the order of grouping.

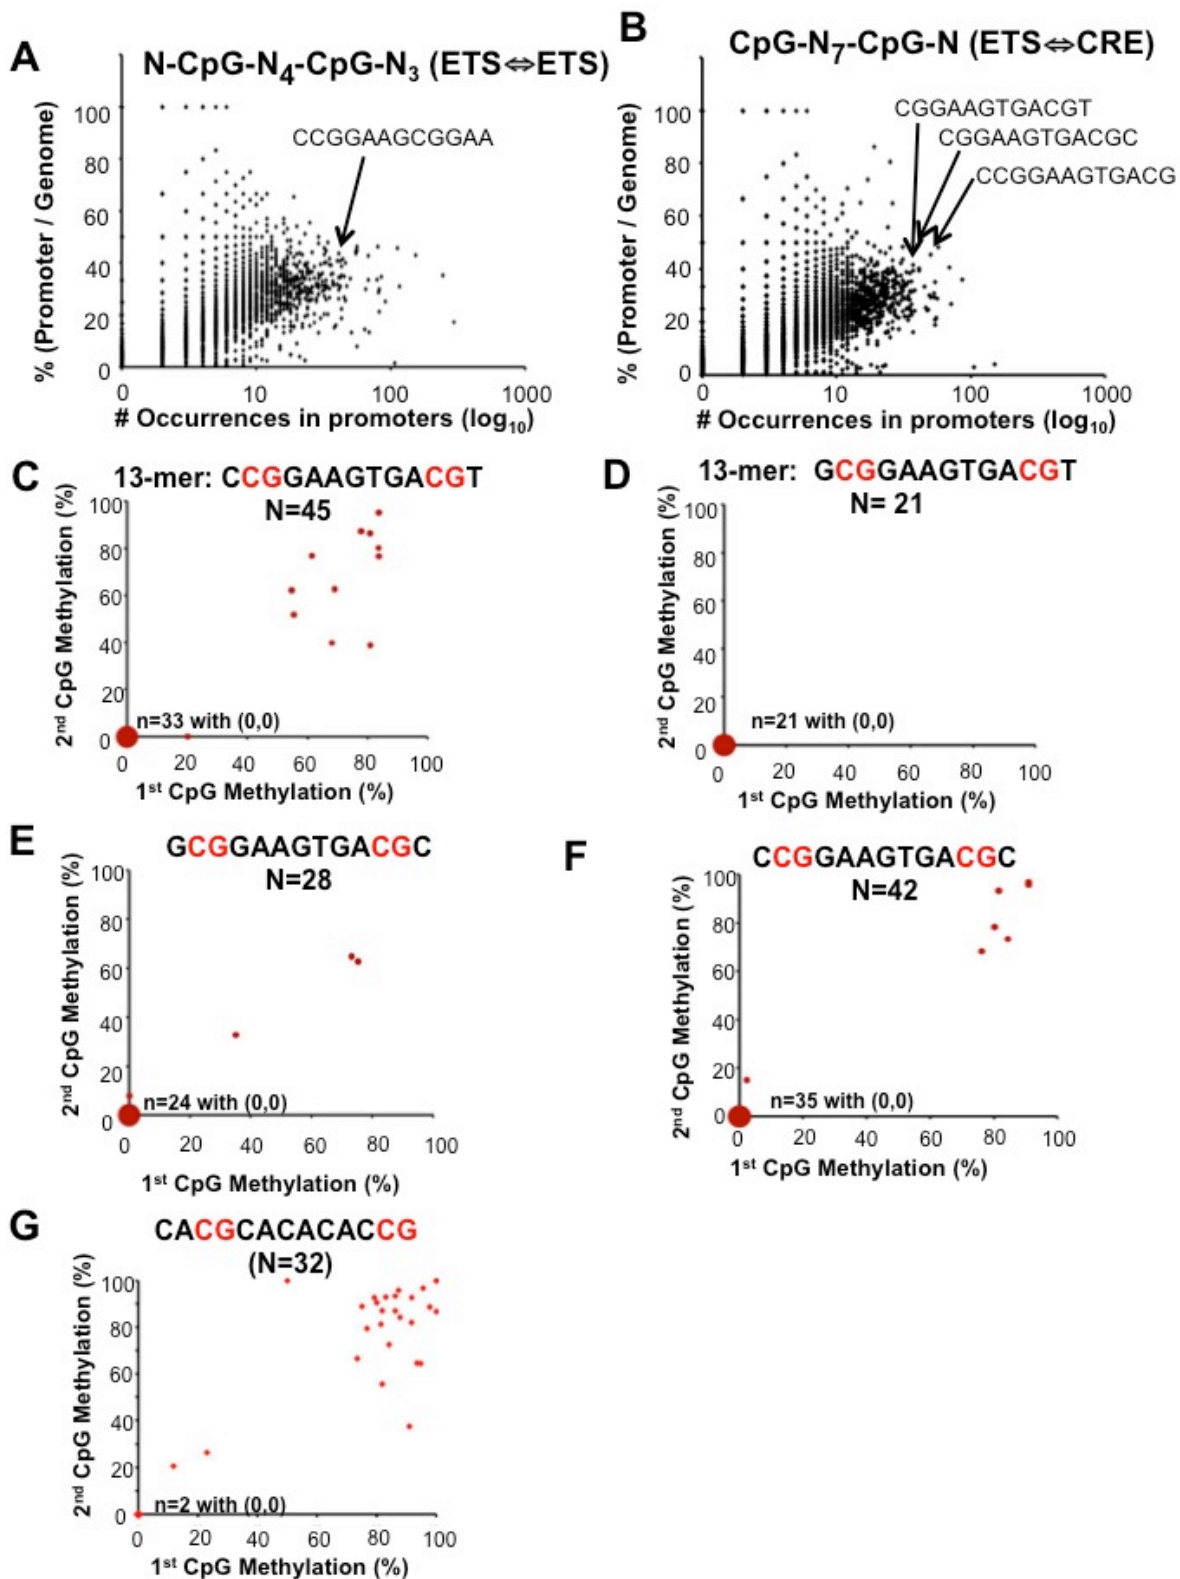

**Figure S4** **A)** Occurrence in mouse promoters compared to the genome of all split 8-mer containing two CGs separated by 4-bps (N-CG-N<sub>4</sub>-CG-N<sub>3</sub>) as is observed in the ETS⇌ETS motif which is labeled. **B)** Occurrence in mouse promoters compared to the genome of all split 8-mer containing two CGs separated by 7-bps CG-N<sub>7</sub>-CG-N as is observed in the ETS⇌CRE motif which is labeled **C-F)** Methylation status in mouse dermal fibroblasts of the 4 ETS⇌CRE 13-mers <sup>C</sup>/<sub>G</sub>CGGAAGTGACG<sup>T</sup>/<sub>C</sub>. Percent methylations of 1st and 2nd CpGs are plotted for each 4 motifs. The majority of occurrences have no CpG methylation on either CpG. **G)** Methylation of 1st and 2nd CGs for the 13-mer CACGCACACACCG with pairs of CpG separated by 7-bps showing both the CpGs in the motif are mostly methylated in dermal fibroblasts.

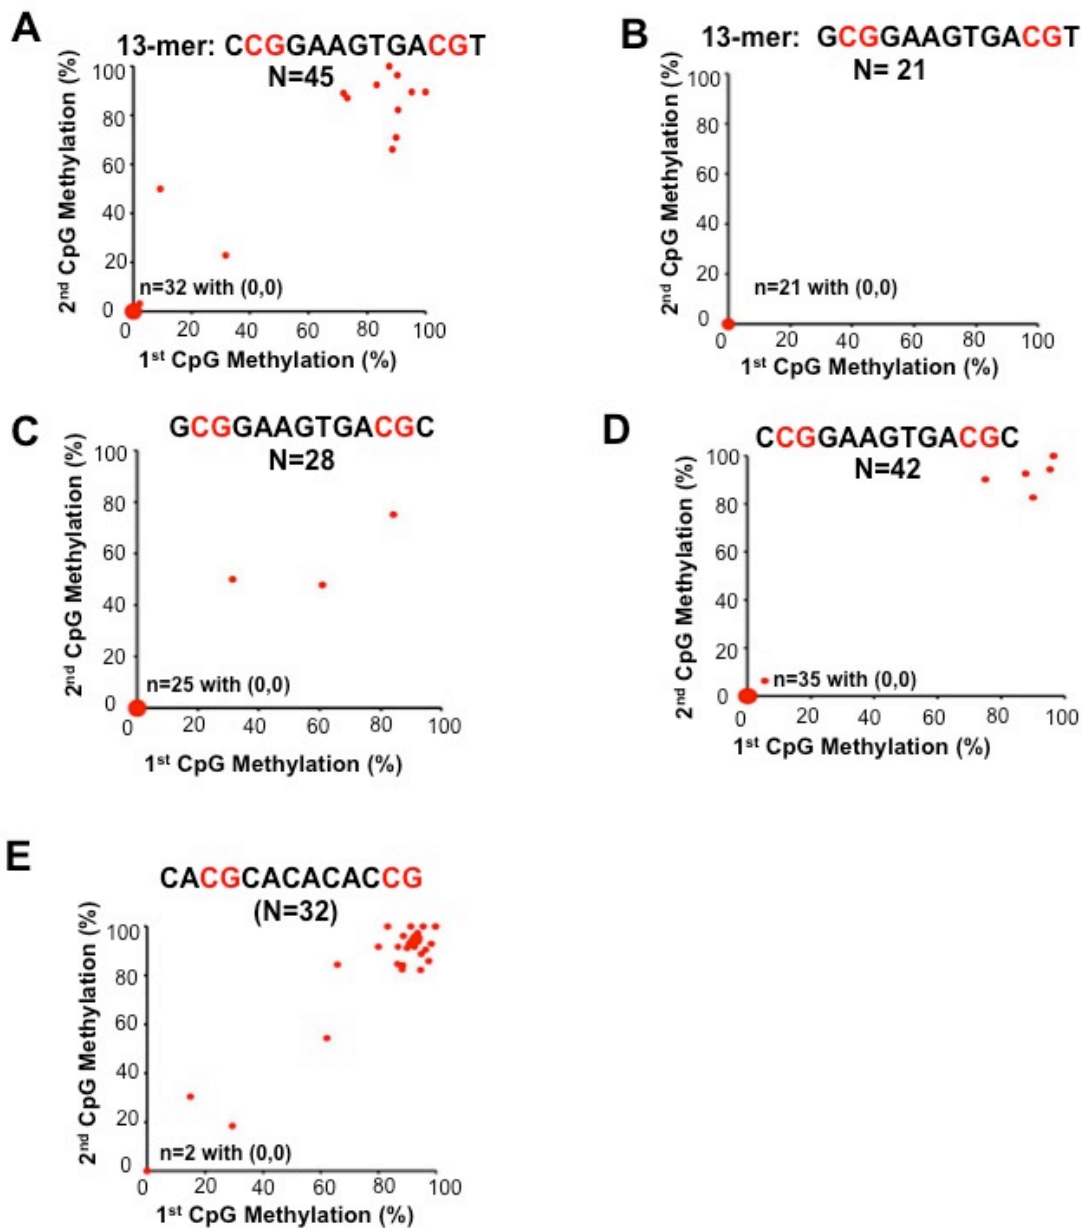

**Figure S5** A-D) Methylation status in mouse primary keratinocytes of the 4 ETS $\rightleftharpoons$ CRE 13-mers  ${}^C_G\text{CGGAAGTGACG}^T/C$ . Percent methylations of 1<sup>st</sup> and 2<sup>nd</sup> CpGs are plotted. The majority of occurrences have no CpG methylation on either CpG. E) Methylation of 1st and 2nd CGs for the 13-mer CACGCACACACCG with pairs of CpG separated by 7-bps showing both the CpGs in the motif are mostly methylated in keratinocytes.

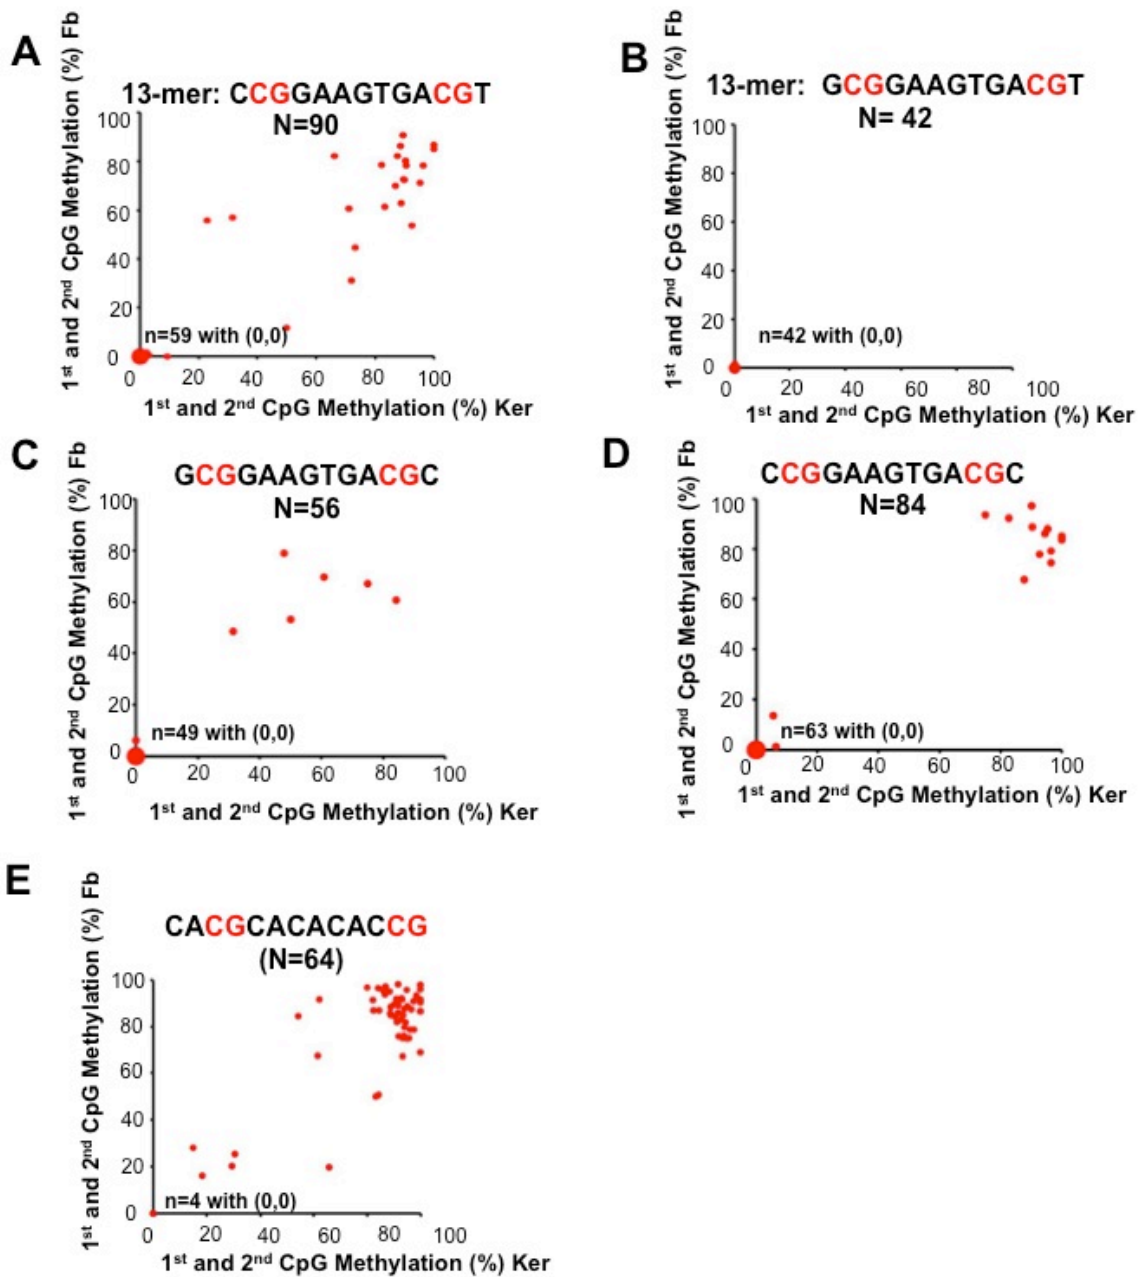

**Figure S6** A-D) Comparison in methylation status of both the CpGs in 4 ETS $\leftrightarrow$ CRE 13-mers  $^C/C$ CGGAAGTGACG $^T/C$  in mouse dermal fibroblasts and keratinocytes. E) Methylation of 1st and 2nd CGs for the 13-mer CACGCACACACCG in primary dermal fibroblasts and keratinocytes.

**Table S1 The Localization Factor (LF) for all continuous ( $X_4-N_0-X_4$ ) and split 8-mers ( $X_4-N_{1-30}-X_4$ ) was determined.** Next, the probability of a non-random distribution was determined and the top 20 for different insert length was determined. For column  $X_4-N_{5-30}-X_4$ , the insert length that produced the highest LF is presented. The most localized split 8-mers are further extended to determine the TFBS or overlapping TFBS and are presented in the column next to the sequence motifs. Two sequences representing the ETS $\Leftrightarrow$ ETS motif and the ETS $\Leftrightarrow$ CRE motif are highlighted in red.

| $X_4-N_0-X_4$ |           |         | $X_4-N_2-X_4$ |           |         | $X_4-N_4-X_4$ |           |         | $X_4-N_{5-30}-X_4$         |           |         |
|---------------|-----------|---------|---------------|-----------|---------|---------------|-----------|---------|----------------------------|-----------|---------|
| Sequence      | Predicted |         | Sequence      | Predicted |         | Sequence      | Predicted |         | Sequence                   | Predicted |         |
|               | TFBS      | P-value |               | TFBS      | P-value |               | TFBS      | P-value |                            | TFBS      | P-value |
| CCGGAAGT      | ETS       | 97      | GTGA--TCAC    | CRE       | 56      | TATA----CGGC  | CpG-TATA  | 92      | ACGT-N <sub>9</sub> -GCGC  | CpG-CRE   | 56      |
| TATAAAGG      | TATA      | 85      | CGGA--TGAC    | ETS-CRE   | 47      | TATA----CGGG  | CpG-TATA  | 36      | GCGC-N <sub>7</sub> -TGAC  | CpG-CRE   | 44      |
| CGGAAGTG      | ETS       | 70      | GCCC--CCCC    | SP1       | 47      | CAAT----GCGC  | CpG-CAAT  | 28      | CGCC-N <sub>8</sub> -TATA  | CpG-TATA  | 38      |
| GCCAATCG      | CAAT      | 61      | TATA--CGGC    | CpG-TATA  | 46      | TATA----GGGC  | CpG-TATA  | 25      | CAAT-N <sub>5</sub> -GCCC  | CpG-CAAT  | 37      |
| CAGCCAAT      | CAAT      | 58      | TATA--AGGG    | CpG-TATA  | 44      | TATA----GCGC  | CpG-TATA  | 24      | ACGT-N <sub>8</sub> -CGCG  | CpG-CRE   | 36      |
| CCCCGCC       | SP1       | 54      | TGAC--CACA    | CRE       | 36      | TATA----CCGG  | CpG-TATA  | 21      | CGCG-N <sub>6</sub> -TGAC  | CpG-CRE   | 35      |
| GCCATCTT      |           | 53      | TATA--CGCG    | CpG-TATA  | 35      | TATA----GCCG  | CpG-TATA  | 19      | CCCT-N <sub>28</sub> -TCCC |           | 33      |
| TATAAAG       | TATA      | 53      | TGAC--CACG    | CRE       | 33      | AGGC----CCCC  |           | 19      | TATA-N <sub>6</sub> -GCGG  | CpG-TATA  | 33      |
| GGCCAATC      | CAAT      | 47      | CAAT--GCGC    | CpG-CAAT  | 28      | CGGA----ACGT  | ETS-CRE   | 18      | TGAC-N <sub>11</sub> -GCGC | CpG-CRE   | 32      |
| CCCGAAG       | ETS       | 47      | GGAA--GGAA    | ETS-ETS   | 26      | CAAT----AGCC  | CpG-CAAT  | 18      | TTAT-N <sub>18</sub> -CGCC | CpG-TATA  | 29      |
| ACCAATCA      | CAAT      | 46      | GGGA--TGTA    |           | 21      | GCGC----ACGT  | CpG-CRE   | 17      | CAAT-N <sub>24</sub> -CCGC | CpG-CAAT  | 28      |
| GGAAGTGA      | ETS-CRE   | 46      | CCCC--CCCT    |           | 20      | CCAA----CGCC  | CpG-CAAT  | 15      | CGCG-N <sub>5</sub> -TATA  | CpG-TATA  | 28      |
| GCCCCGCC      | SP1       | 44      | GCGG--CAAT    | CpG-CAAT  | 19      | TGCG----CGCG  |           | 15      | GGCG-N <sub>8</sub> -TGAC  | CpG-CRE   | 27      |
| GCCAATCA      | CAAT      | 44      | ACCG--AGTG    | ETS       | 18      | CAAT----GCCC  | CpG-CAAT  | 15      | GGCG-N <sub>19</sub> -CAAT | CpG-CAAT  | 26      |
| GCGGAAGT      | ETS       | 43      | AGCG--AGTG    | ETS       | 18      | CAAT----GGCG  | CpG-CAAT  | 14      | TTAT-N <sub>15</sub> -CCCG | CpG-TATA  | 25      |
| CCAATGGG      | CAAT      | 41      | CGCC--AAGT    | ETS       | 18      | AGCA----AATG  |           | 14      | TATA-N <sub>6</sub> -GCCG  | CpG-TATA  | 24      |
| CGGCAAT       | CAAT      | 40      | TATA--CCCG    | CpG-TATA  | 18      | TATA----GGGA  | CpG-TATA  | 14      | TATA-N <sub>11</sub> -CGGC | CpG-TATA  | 24      |
| CCAATCAG      | CAAT      | 39      | TATA--AGCG    | CpG-TATA  | 17      | CCGC----ATAA  | CpG-TATA  | 13      | ACCA-N <sub>24</sub> -ATGG |           | 23      |
| AAGTGACG      | CRE       | 37      | CCCC--CCAC    |           | 17      | TATA----GGCC  | CpG-TATA  | 13      | CGCC-N <sub>7</sub> -TTAT  | CpG-TATA  | 23      |
| CCATCTTG      |           | 37      | CGCG--TTAT    | CpG-TATA  | 17      | CAAT----GGGC  | CpG-CAAT  | 13      | TCAT-N <sub>7</sub> -CGCC  | CpG-CRE   | 23      |



**Table S2 Occurrence of different length of ETS⇔CRE motifs in the human genome, promoters, proximal promoters, CpG Islands and housekeeping DNase hypersensitive sites.**

| Motifs  | N-mers | DNA sequence     | Whole Genome      | Promoter             | Proximal Promoter  | CpG Islands | House-keeping DHS | All DHS     | Tissue-specific DHS |
|---------|--------|------------------|-------------------|----------------------|--------------------|-------------|-------------------|-------------|---------------------|
|         |        |                  | # Unmasked (100%) | (-1000...500) (0.8%) | (-200...60) (0.1%) | (0.7%)      | (0.2%)            | (8.9%)      | (8.7%)              |
| ETS     | 8-mer  | CGGAAGTG         | 16,846            | 1,631 (10%)          | 980 (6%)           | 1,761 (10%) | 1,073 (6%)        | 5,068 (30%) | 3,997 (24%)         |
| ETS     | 9-mer  | CGGAAGTGA        | 4,675             | 465 (10%)            | 298 (6%)           | 446 (10%)   | 343 (7%)          | 1,456 (31%) | 1,113 (24%)         |
| ETS     | 10-mer | CGGAAGTGAC       | 1,030             | 227 (22%)            | 162 (16%)          | 227 (22%)   | 180 (17%)         | 458 (44%)   | 278 (27%)           |
| ETS⇔CRE | 11-mer | CGGAAGTGACG      | 226               | 157 (69%)            | 124 (55%)          | 164 (73%)   | 134 (59%)         | 186 (82%)   | 52 (23%)            |
| ETS⇔CRE | 12-mer | CGGAAGTGACGT     | 93                | 70 (75%)             | 53 (57%)           | 71 (76%)    | 60 (65%)          | 84 (90%)    | 24 (26%)            |
| ETS⇔CRE | 13-mer | CGGAAGTGACGTC    | 33                | 23 (70%)             | 17 (52%)           | 25 (76%)    | 19 (58%)          | 29 (88%)    | 10 (30%)            |
| ETS⇔CRE | 14-mer | CGGAAGTGACGTCA   | 18                | 13 (72%)             | 11 (61%)           | 15 (83%)    | 12 (67%)          | 18 (100%)   | 6 (33%)             |
| ETS⇔CRE | 15-mer | CGGAAGTGACGTCAC  | 7                 | 5 (71%)              | 4 (57%)            | 6 (86%)     | 4 (57%)           | 7 (100%)    | 3 (43%)             |
| ETS⇔CRE | 8-mer  | AAGTGACG         | 17,396            | 478 (3%)             | 234 (1%)           | 451 (3%)    | 279 (2%)          | 2,647 (15%) | 2,369 (14%)         |
| ETS⇔CRE | 9-mer  | GAAGTGACG        | 4,183             | 289 (7%)             | 191 (5%)           | 275 (7%)    | 212 (5%)          | 1,009 (24%) | 798 (19%)           |
| ETS⇔CRE | 10-mer | GGAAGTGACG       | 1,618             | 236 (15%)            | 176 (11%)          | 236 (15%)   | 190 (12%)         | 608 (38%)   | 418 (26%)           |
| ETS⇔CRE | 11-mer | CGGAAGTGACG      | 226               | 157 (69%)            | 124 (55%)          | 164 (73%)   | 134 (59%)         | 186 (82%)   | 52 (23%)            |
| ETS⇔CRE | 12-mer | CCGGAAGTGACG     | 100               | 79 (79%)             | 59 (59%)           | 83 (83%)    | 62 (62%)          | 93 (93%)    | 31 (31%)            |
| ETS⇔CRE | 13-mer | GCCGGAAGTGACG    | 33                | 25 (76%)             | 18 (55%)           | 28 (85%)    | 19 (58%)          | 30 (91%)    | 11 (33%)            |
| ETS⇔CRE | 16-mer | GCGGAAGTGACGTCAC | 2                 | 2 (100%)             | 2 (100%)           | 2 (100%)    | 2 (100%)          | 2 (100%)    | 0 (0%)              |

**Table S3 Enriched GO terms (P<0.05) for the human genes that have one of the 4 ETS↔CRE 12-mer or 13-mers (<sup>C</sup>/<sub>6</sub>CGGAAGTGACG<sup>T</sup>/<sub>C</sub>) in promoters.** There are no enriched GO terms with P-value <0.05 for the genes with <sup>C</sup>/<sub>6</sub>CGGAAGTGACGC in their promoters.

| Motif   | Sequence              | GO Term    | Description                                                  | Count | Backgr<br>ound<br>count | P-<br>Value |
|---------|-----------------------|------------|--------------------------------------------------------------|-------|-------------------------|-------------|
| ETS↔CRE | 12-mer: CGGAAGTGACGC  | GO:0006281 | DNA repair                                                   | 5     | 284                     | 8.8E-03     |
|         |                       | GO:0016567 | protein ubiquitination                                       | 5     | 119                     | 1.3E-03     |
|         | 12-mer: CGGAAGTGACGT  | GO:0032446 | protein modification by small protein conjugation            | 5     | 132                     | 1.9E-03     |
|         |                       | GO:0070647 | protein modification by small protein conjugation or removal | 5     | 160                     | 3.8E-03     |
|         |                       | GO:0044265 | cellular macromolecule catabolic process                     | 9     | 725                     | 7.6E-03     |
|         |                       | GO:0009057 | macromolecule catabolic process                              | 9     | 781                     | 1.2E-02     |
|         |                       | GO:0006396 | RNA processing                                               | 9     | 547                     | 1.4E-03     |
|         |                       | GO:0006397 | mRNA processing                                              | 6     | 321                     | 8.9E-03     |
|         | 13-mer: GCGGAAGTGACGT | GO:0051276 | chromosome organization                                      | 5     | 485                     | 6.0E-03     |
|         |                       | GO:0045449 | regulation of transcription                                  | 13    | 2601                    | 1.3E-04     |
|         | 13-mer: CCGGAAGTGACGT | GO:0016567 | protein ubiquitination                                       | 3     | 119                     | 1.4E-02     |

**Table S4 Occurrence of unmethylated versions of the ETS↔CRE motifs in the mouse genome with 24,273 promoters and proximal promoters and 16,026 CpG Islands.** Unmethylated occurrences are presented in parenthesis.

| Motifs                                | N-mers | DNA sequence    | Whole Genome<br>(# Unmethylated) | Promoter<br>(#Unmethylated) | Proximal Promoter<br>(#Unmethylated) | CpG Islands<br>(#Unmethylated)<br>(0.34%) |
|---------------------------------------|--------|-----------------|----------------------------------|-----------------------------|--------------------------------------|-------------------------------------------|
|                                       |        |                 | (100%)                           | (-1000...500)<br>(1.18%)    | (-200...60) (0.19%)                  |                                           |
| ETS                                   | 8-mer  | CCGGAAGT        | 16346 (2350)                     | 1261 (990)                  | 704 (643)                            | 1362 (1286)                               |
| CRE                                   | 8-mer  | TGACGTCA        | 14297 (1561)                     | 578 (432)                   | 315 (268)                            | 599 (569)                                 |
| ETS↔CRE                               | 12-mer | CGGAAGTGACGT    | 89 (67)                          | 37 (36)                     | 31 (31)                              | 60 (60)                                   |
| ETS↔CRE                               | 12-mer | CGGAAGTGACGC    | 82 (68)                          | 35 (35)                     | 33 (33)                              | 68 (67)                                   |
| ETS↔CRE                               | 13-mer | GCGGAAGTGACGT   | 21 (21)                          | 10 (10)                     | 7 (7)                                | 19 (19)                                   |
| ETS↔CRE                               | 13-mer | GCGGAAGTGACGC   | 28 (25)                          | 15 (15)                     | 13 (13)                              | 26 (25)                                   |
| ETS↔CRE                               | 13-mer | CCGGAAGTGACGT   | 45 (34)                          | 21 (20)                     | 18 (18)                              | 29 (29)                                   |
| ETS↔CRE                               | 13-mer | CCGGAAGTGACGC   | 42 (36)                          | 22 (22)                     | 17 (17)                              | 35 (35)                                   |
| ETS↔CRE                               | 15-mer | CCGGAAGTGACGTCA | 12 (8)                           | 8 (7)                       | 7 (7)                                | 7 (7)                                     |
| N-CG-N <sub>7</sub> -CG               | 12-mer | ACGCACACACCG    | 42 (8)                           | 3 (3)                       | 5 (4)                                | 0 (0)                                     |
| N <sub>2</sub> -CG-N <sub>7</sub> -CG | 13-mer | CACGCACACACCG   | 32 (4)                           | 2 (2)                       | 3 (2)                                | 0 (0)                                     |
