# Supplementary material for: Overlapping ETS and CRE Motifs (G/CCGGAAGTGACGTCA) Preferentially Bound by GABPα and CREB Proteins
Source: PubMed Central journal article supplement (PMC3464117; doi:10.1534/g3.112.004002), 2012-10-01
Supplement: supp_2.10.1243_FigureS2.pdf [file supp_2.10.1243_FigureS2.pdf]

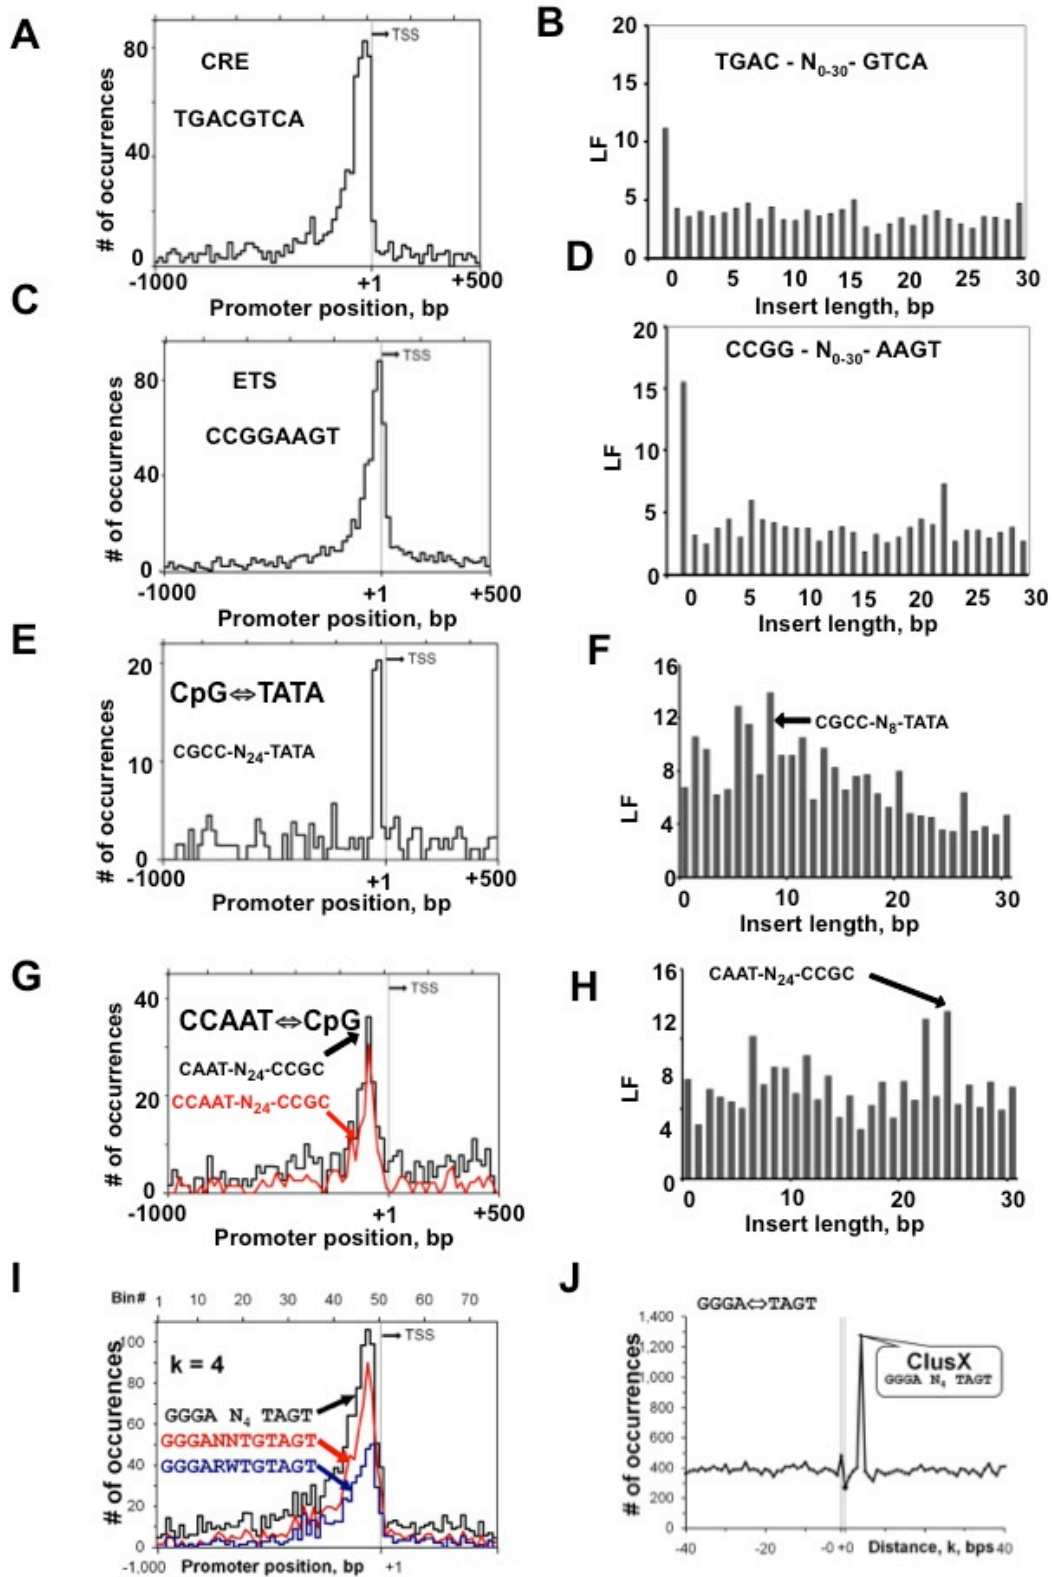

**Figure S2** **A**) Distribution of the CRE 8-mer TGACGTCA in human promoters. **B**) LF for CRE 8-mer with insert length ranging from 0-bps to 30-bps (TGAC-N<sub>0-30</sub>-GTCA). **C**) Distribution of the ETS TFBS (CCGGAAGT) in promoters counting occurrence in 20 bp bins. **D**) LF for ETS 8-mer (CCGG-N<sub>0-30</sub>-AAGT) with insert length ranging from 0-bps to 30-bps. The 8-mer CCGGAAGT preferentially localizes in promoters when the two 4-mers are abutted. High LF values are also observed at additional insert

length, including CCGG-N<sub>6</sub>-AAGT, which represents the ETS $\leftrightarrow$ ETS motif and CCGG-N<sub>23</sub>-AAGT. **E)** Distribution of the split 8-mer CGCC-N<sub>24</sub>-TATA in promoters. **F)** LF for CGCC-N<sub>0-30</sub>-TATA with insert length ranging from 0-bps to 30-bps. **G)** Distribution of the split 8-mer CAAT-N<sub>24</sub>-CCGC in human promoters. The most localizing motif is the split 9-mer CCAAT-N<sub>24</sub>-CCGC marked in red. **H)** LF for CAAT-N<sub>0-30</sub>-CCGC with insert length from 0-bps to 30-bps. **I)** Distribution of the split 8-mer GGGA-N<sub>4</sub>-TAGT and more localizing split 10-mer GGGA-N<sub>2</sub>-TGTAGT. **J)** Occurrences of split 8-mer GGGA-N<sub>0-40</sub>-TAGT with insert length ranging from 0-bps to 40-bps. The reverse order of the two 4-mers TAGT-N<sub>0-40</sub>-GGGA is shown with negative values.
