# Supplementary material for: Overlapping ETS and CRE Motifs (G/CCGGAAGTGACGTCA) Preferentially Bound by GABPα and CREB Proteins
Source: PubMed Central journal article supplement (PMC3464117; doi:10.1534/g3.112.004002), 2012-10-01
Supplement: supp_2.10.1243_FigureS3.pdf [file supp_2.10.1243_FigureS3.pdf]

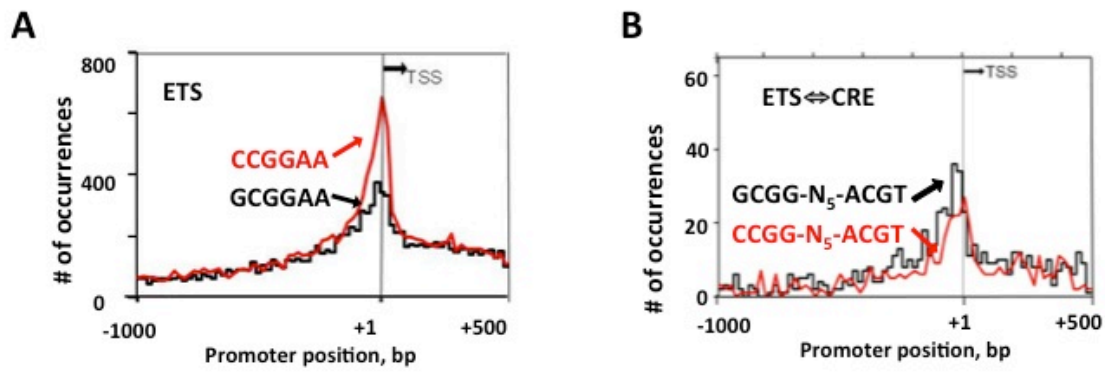

### C DNA surrounding the ETS $\leftrightarrow$ CRE 11-mers

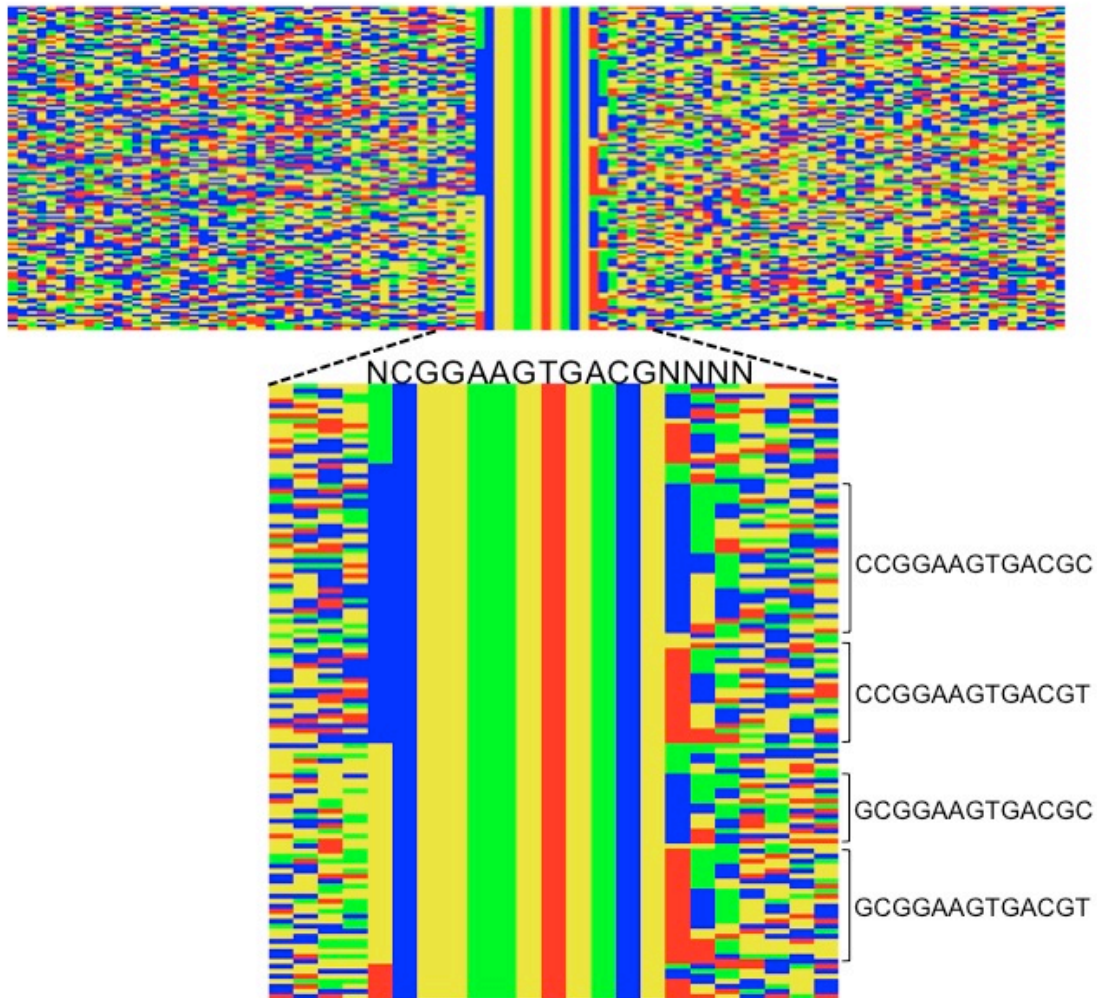

**Figure S3** **A)** Distribution of the two ETS TFBS (CCGGAA and GCGGAA). **B)** Distribution of the two split 8-mers GCGG-N<sub>5</sub>-ACGT and CCGG-N<sub>5</sub>-ACGT representing the ETS $\leftrightarrow$ CRE motif. **C)** Color representation of the sequences surrounding the 134 ETS $\leftrightarrow$ CRE 11-mers that occur in housekeeping DHSs with C=blue, G=yellow, A=green and T=red. The core part of the ETS $\leftrightarrow$ CRE motif is shown in inset. Sequences were grouped based on the nucleotides as shown by numbers in bold: **1**CGGAAGTGACG**2345** where the numbers represent the order of grouping.
