# Supplementary material for: Overlapping ETS and CRE Motifs (G/CCGGAAGTGACGTCA) Preferentially Bound by GABPα and CREB Proteins
Source: PubMed Central journal article supplement (PMC3464117; doi:10.1534/g3.112.004002), 2012-10-01
Supplement: supp_2.10.1243_FigureS4.pdf [file supp_2.10.1243_FigureS4.pdf]

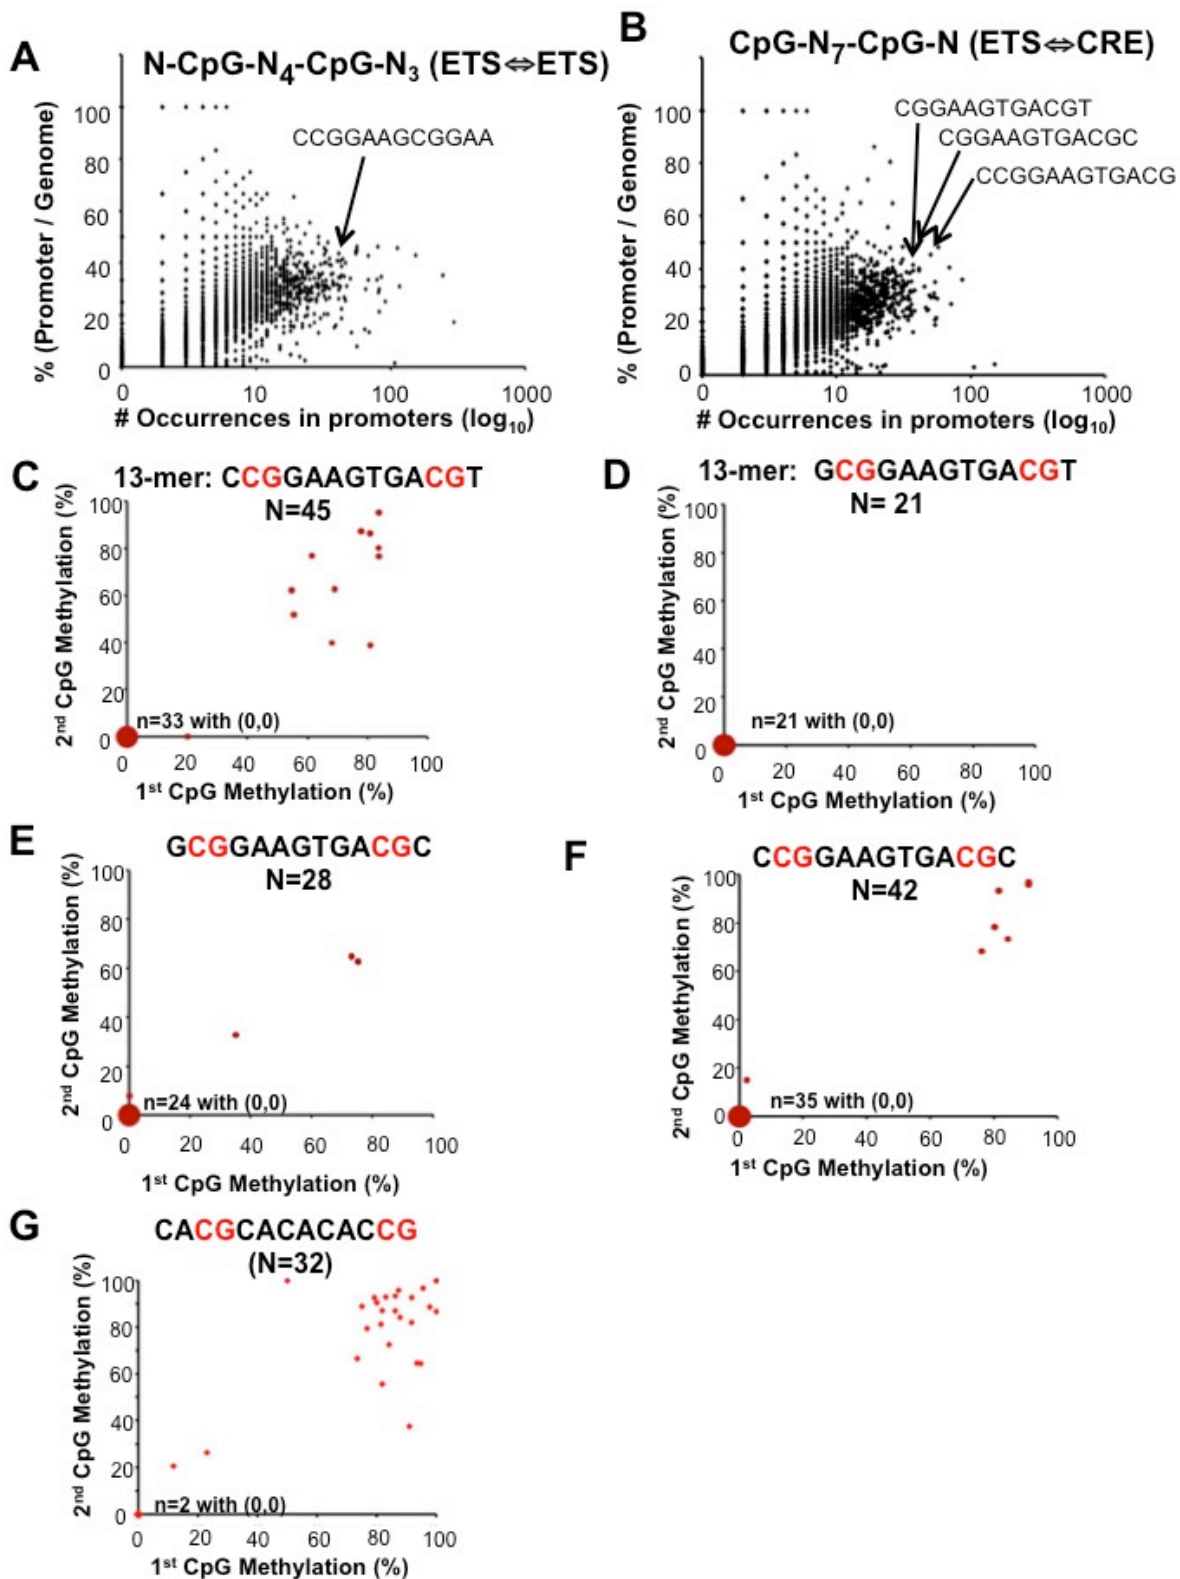

**Figure S4** **A)** Occurrence in mouse promoters compared to the genome of all split 8-mer containing two CGs separated by 4-bps (N-CG-N<sub>4</sub>-CG-N<sub>3</sub>) as is observed in the ETS⇌ETS motif which is labeled. **B)** Occurrence in mouse promoters compared to the genome of all split 8-mer containing two CGs separated by 7-bps CG-N<sub>7</sub>-CG-N) as is observed in the ETS⇌CRE motif which is labeled. **C-F)** Methylation status in mouse dermal fibroblasts of the 4 ETS⇌CRE 13-mers <sup>C</sup>/CGGAAGTGACG<sup>T</sup>/<sub>C</sub>. Percent methylations of 1st and 2nd CpGs are plotted for each 4 motifs. The majority of occurrences have no CpG methylation on either CpG. **G)** Methylation of 1st and 2nd CGs for the 13-mer CACGCACACACCG with pairs of CpG separated by 7-bps showing both the CpGs in the motif are mostly methylated in dermal fibroblasts.
