# Supplementary material for: Overlapping ETS and CRE Motifs (G/CCGGAAGTGACGTCA) Preferentially Bound by GABPα and CREB Proteins
Source: PubMed Central journal article supplement (PMC3464117; doi:10.1534/g3.112.004002), 2012-10-01
Supplement: supp_2.10.1243_FigureS5.pdf [file supp_2.10.1243_FigureS5.pdf]

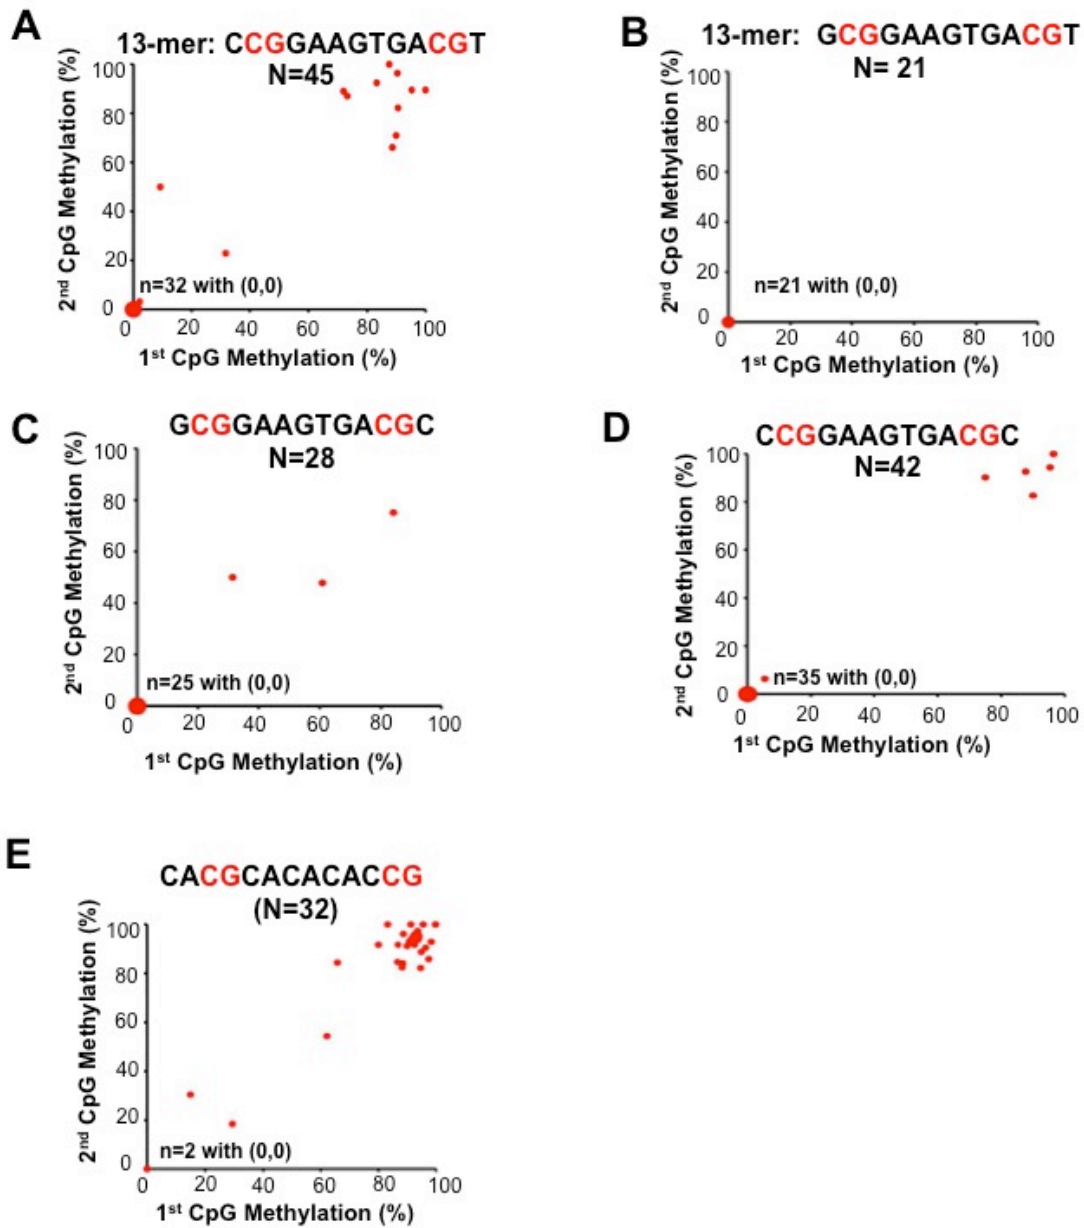

**Figure S5** A-D) Methylation status in mouse primary keratinocytes of the 4 ETS $\rightleftharpoons$ CRE 13-mers  ${}^C_G\text{CGGAAGTGACG}^T/C$ . Percent methylations of 1<sup>st</sup> and 2<sup>nd</sup> CpGs are plotted. The majority of occurrences have no CpG methylation on either CpG. E) Methylation of 1st and 2nd CGs for the 13-mer CACGCACACACCG with pairs of CpG separated by 7-bps showing both the CpGs in the motif are mostly methylated in keratinocytes.
