# Supplementary material for: Overlapping ETS and CRE Motifs (G/CCGGAAGTGACGTCA) Preferentially Bound by GABPα and CREB Proteins
Source: PubMed Central journal article supplement (PMC3464117; doi:10.1534/g3.112.004002), 2012-10-01
Supplement: supp_2.10.1243_FigureS6.pdf [file supp_2.10.1243_FigureS6.pdf]

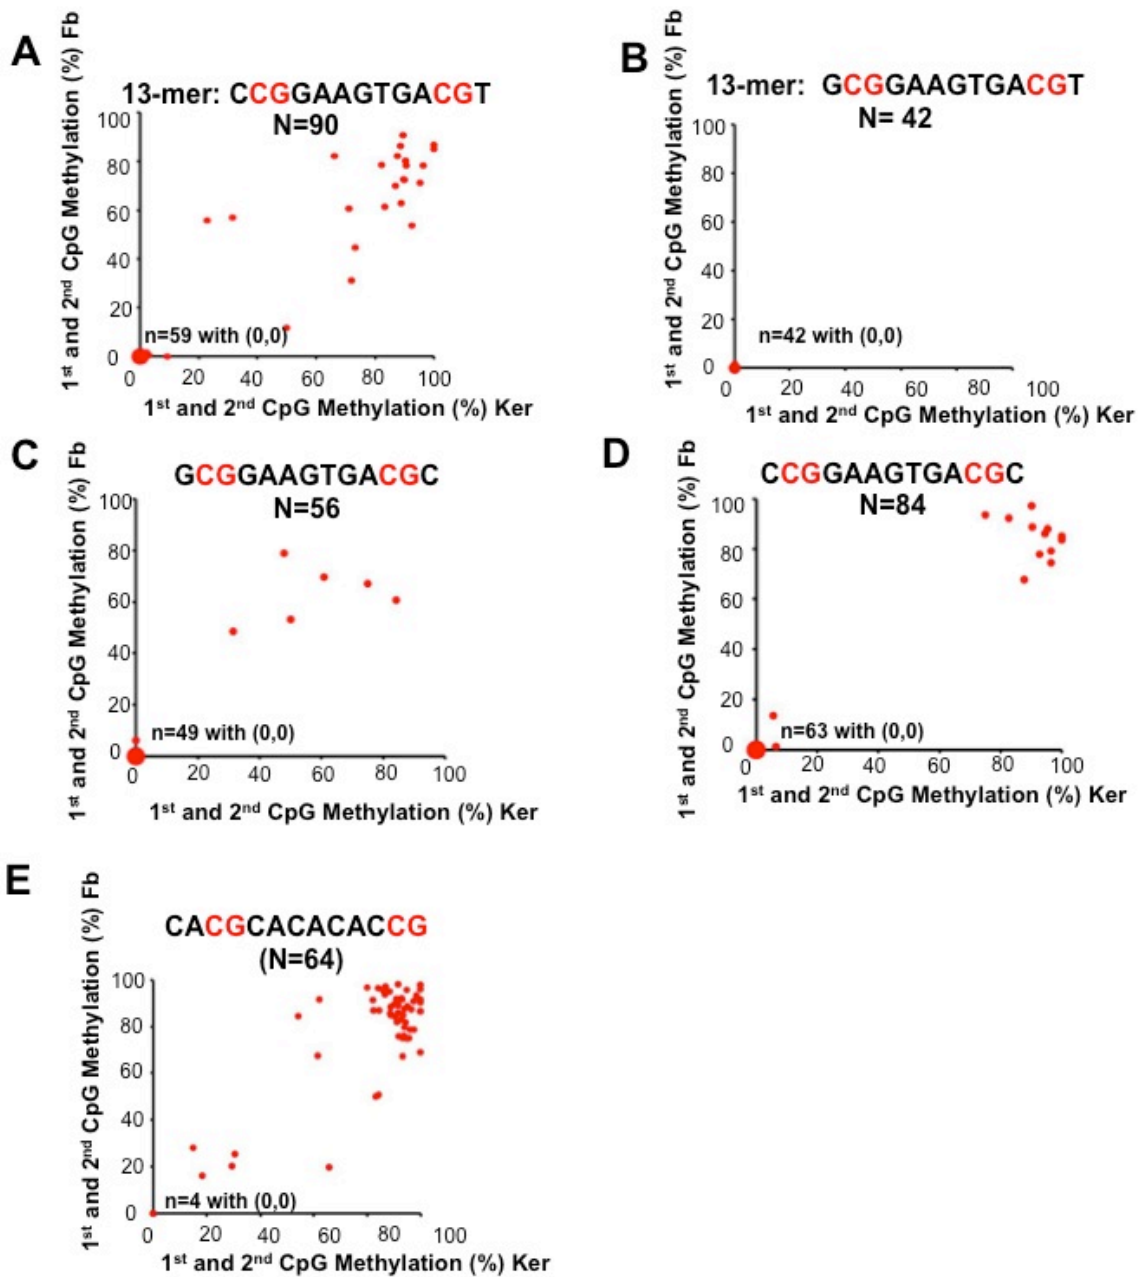

**Figure S6** A-D) Comparison in methylation status of both the CpGs in 4 ETS $\leftrightarrow$ CRE 13-mers  $^C/C$ CGGAAGTGACG $^T/C$  in mouse dermal fibroblasts and keratinocytes. E) Methylation of 1st and 2nd CGs for the 13-mer CACGCACACACCG in primary dermal fibroblasts and keratinocytes.
