# Supplementary material for: Overlapping ETS and CRE Motifs (G/CCGGAAGTGACGTCA) Preferentially Bound by GABPα and CREB Proteins
Source: PubMed Central journal article supplement (PMC3464117; doi:10.1534/g3.112.004002), 2012-10-01
Supplement: supp_2.10.1243_TableS1.pdf [file supp_2.10.1243_TableS1.pdf]

**Table S1 The Localization Factor (LF) for all continuous ( $X_4-N_0-X_4$ ) and split 8-mers ( $X_4-N_{1-30}-X_4$ ) was determined.** Next, the probability of a non-random distribution was determined and the top 20 for different insert length was determined. For column  $X_4-N_{5-30}-X_4$ , the insert length that produced the highest LF is presented. The most localized split 8-mers are further extended to determine the TFBS or overlapping TFBS and are presented in the column next to the sequence motifs. Two sequences representing the ETS $\Leftrightarrow$ ETS motif and the ETS $\Leftrightarrow$ CRE motif are highlighted in red.

| $X_4-N_0-X_4$ |           |         | $X_4-N_2-X_4$ |           |         | $X_4-N_4-X_4$ |           |         | $X_4-N_{5-30}-X_4$         |           |         |
|---------------|-----------|---------|---------------|-----------|---------|---------------|-----------|---------|----------------------------|-----------|---------|
| Sequence      | Predicted |         | Sequence      | Predicted |         | Sequence      | Predicted |         | Sequence                   | Predicted |         |
|               | TFBS      | P-value |               | TFBS      | P-value |               | TFBS      | P-value |                            | TFBS      | P-value |
| CCGGAAGT      | ETS       | 97      | GTGA--TCAC    | CRE       | 56      | TATA----CGGC  | CpG-TATA  | 92      | ACGT-N <sub>9</sub> -GCGC  | CpG-CRE   | 56      |
| TATAAAGG      | TATA      | 85      | CGGA--TGAC    | ETS-CRE   | 47      | TATA----CGGG  | CpG-TATA  | 36      | GCGC-N <sub>7</sub> -TGAC  | CpG-CRE   | 44      |
| CGGAAGTG      | ETS       | 70      | GCCC--CCCC    | SP1       | 47      | CAAT----GCGC  | CpG-CAAT  | 28      | CGCC-N <sub>8</sub> -TATA  | CpG-TATA  | 38      |
| GCCAATCG      | CAAT      | 61      | TATA--CGGC    | CpG-TATA  | 46      | TATA----GGGC  | CpG-TATA  | 25      | CAAT-N <sub>5</sub> -GCCC  | CpG-CAAT  | 37      |
| CAGCCAAT      | CAAT      | 58      | TATA--AGGG    | CpG-TATA  | 44      | TATA----GCGC  | CpG-TATA  | 24      | ACGT-N <sub>8</sub> -CGCG  | CpG-CRE   | 36      |
| CCCCGCC       | SP1       | 54      | TGAC--CACA    | CRE       | 36      | TATA----CCGG  | CpG-TATA  | 21      | CGCG-N <sub>6</sub> -TGAC  | CpG-CRE   | 35      |
| GCCATCTT      |           | 53      | TATA--CGCG    | CpG-TATA  | 35      | TATA----GCCG  | CpG-TATA  | 19      | CCCT-N <sub>28</sub> -TCCC |           | 33      |
| TATAAAG       | TATA      | 53      | TGAC--CACG    | CRE       | 33      | AGGC----CCCC  |           | 19      | TATA-N <sub>6</sub> -GCGG  | CpG-TATA  | 33      |
| GGCCAATC      | CAAT      | 47      | CAAT--GCGC    | CpG-CAAT  | 28      | CGGA----ACGT  | ETS-CRE   | 18      | TGAC-N <sub>11</sub> -GCGC | CpG-CRE   | 32      |
| CCCGAAG       | ETS       | 47      | GGAA--GGAA    | ETS-ETS   | 26      | CAAT----AGCC  | CpG-CAAT  | 18      | TTAT-N <sub>18</sub> -CGCC | CpG-TATA  | 29      |
| ACCAATCA      | CAAT      | 46      | GGGA--TGTA    |           | 21      | GCGC----ACGT  | CpG-CRE   | 17      | CAAT-N <sub>24</sub> -CCGC | CpG-CAAT  | 28      |
| GGAAGTGA      | ETS-CRE   | 46      | CCCC--CCCT    |           | 20      | CCAA----CGCC  | CpG-CAAT  | 15      | CGCG-N <sub>5</sub> -TATA  | CpG-TATA  | 28      |
| GCCCCGCC      | SP1       | 44      | GCGG--CAAT    | CpG-CAAT  | 19      | TGCG----CGCG  |           | 15      | GGCG-N <sub>8</sub> -TGAC  | CpG-CRE   | 27      |
| GCCAATCA      | CAAT      | 44      | ACCG--AGTG    | ETS       | 18      | CAAT----GCCC  | CpG-CAAT  | 15      | GGCG-N <sub>19</sub> -CAAT | CpG-CAAT  | 26      |
| GCGGAAGT      | ETS       | 43      | AGCG--AGTG    | ETS       | 18      | CAAT----GGCG  | CpG-CAAT  | 14      | TTAT-N <sub>15</sub> -CCCG | CpG-TATA  | 25      |
| CCAATGGG      | CAAT      | 41      | CGCC--AAGT    | ETS       | 18      | AGCA----AATG  |           | 14      | TATA-N <sub>6</sub> -GCCG  | CpG-TATA  | 24      |
| CGGCAAT       | CAAT      | 40      | TATA--CCCG    | CpG-TATA  | 18      | TATA----GGGA  | CpG-TATA  | 14      | TATA-N <sub>11</sub> -CGGC | CpG-TATA  | 24      |
| CCAATCAG      | CAAT      | 39      | TATA--AGCG    | CpG-TATA  | 17      | CCGC----ATAA  | CpG-TATA  | 13      | ACCA-N <sub>24</sub> -ATGG |           | 23      |
| AAGTGACG      | CRE       | 37      | CCCC--CCAC    |           | 17      | TATA----GGCC  | CpG-TATA  | 13      | CGCC-N <sub>7</sub> -TTAT  | CpG-TATA  | 23      |
| CCATCTTG      |           | 37      | CGCG--TTAT    | CpG-TATA  | 17      | CAAT----GGGC  | CpG-CAAT  | 13      | TCAT-N <sub>7</sub> -CGCC  | CpG-CRE   | 23      |
