# Supplementary material for: Overlapping ETS and CRE Motifs (G/CCGGAAGTGACGTCA) Preferentially Bound by GABPα and CREB Proteins
Source: PubMed Central journal article supplement (PMC3464117; doi:10.1534/g3.112.004002), 2012-10-01
Supplement: supp_2.10.1243_TableS2.pdf [file supp_2.10.1243_TableS2.pdf]

**Table S2 Occurrence of different length of ETS⇔CRE motifs in the human genome, promoters, proximal promoters, CpG Islands and housekeeping DNase hypersensitive sites.**

| Motifs  | N-mers | DNA sequence    | Whole Genome      | Promoter             | Proximal Promoter  | CpG Islands | House-keeping DHS | All DHS     | Tissue-specific DHS |
|---------|--------|-----------------|-------------------|----------------------|--------------------|-------------|-------------------|-------------|---------------------|
|         |        |                 | # Unmasked (100%) | (-1000...500) (0.8%) | (-200...60) (0.1%) | (0.7%)      | (0.2%)            | (8.9%)      | (8.7%)              |
| ETS     | 8-mer  | CGGAAGTG        | 16,846            | 1,631 (10%)          | 980 (6%)           | 1,761 (10%) | 1,073 (6%)        | 5,068 (30%) | 3,997 (24%)         |
| ETS     | 9-mer  | CGGAAGTGA       | 4,675             | 465 (10%)            | 298 (6%)           | 446 (10%)   | 343 (7%)          | 1,456 (31%) | 1,113 (24%)         |
| ETS     | 10-mer | CGGAAGTGAC      | 1,030             | 227 (22%)            | 162 (16%)          | 227 (22%)   | 180 (17%)         | 458 (44%)   | 278 (27%)           |
| ETS⇔CRE | 11-mer | CGGAAGTGACG     | 226               | 157 (69%)            | 124 (55%)          | 164 (73%)   | 134 (59%)         | 186 (82%)   | 52 (23%)            |
| ETS⇔CRE | 12-mer | CGGAAGTGACGT    | 93                | 70 (75%)             | 53 (57%)           | 71 (76%)    | 60 (65%)          | 84 (90%)    | 24 (26%)            |
| ETS⇔CRE | 13-mer | CGGAAGTGACGTC   | 33                | 23 (70%)             | 17 (52%)           | 25 (76%)    | 19 (58%)          | 29 (88%)    | 10 (30%)            |
| ETS⇔CRE | 14-mer | CGGAAGTGACGTCA  | 18                | 13 (72%)             | 11 (61%)           | 15 (83%)    | 12 (67%)          | 18 (100%)   | 6 (33%)             |
| ETS⇔CRE | 15-mer | CGGAAGTGACGTAC  | 7                 | 5 (71%)              | 4 (57%)            | 6 (86%)     | 4 (57%)           | 7 (100%)    | 3 (43%)             |
| ETS⇔CRE | 8-mer  | AAGTGACG        | 17,396            | 478 (3%)             | 234 (1%)           | 451 (3%)    | 279 (2%)          | 2,647 (15%) | 2,369 (14%)         |
| ETS⇔CRE | 9-mer  | GAAGTGACG       | 4,183             | 289 (7%)             | 191 (5%)           | 275 (7%)    | 212 (5%)          | 1,009 (24%) | 798 (19%)           |
| ETS⇔CRE | 10-mer | GGAAGTGACG      | 1,618             | 236 (15%)            | 176 (11%)          | 236 (15%)   | 190 (12%)         | 608 (38%)   | 418 (26%)           |
| ETS⇔CRE | 11-mer | CGGAAGTGACG     | 226               | 157 (69%)            | 124 (55%)          | 164 (73%)   | 134 (59%)         | 186 (82%)   | 52 (23%)            |
| ETS⇔CRE | 12-mer | CCGGAAGTGACG    | 100               | 79 (79%)             | 59 (59%)           | 83 (83%)    | 62 (62%)          | 93 (93%)    | 31 (31%)            |
| ETS⇔CRE | 13-mer | GCCGGAAGTGACG   | 33                | 25 (76%)             | 18 (55%)           | 28 (85%)    | 19 (58%)          | 30 (91%)    | 11 (33%)            |
| ETS⇔CRE | 16-mer | GCGGAAGTGACGTAC | 2                 | 2 (100%)             | 2 (100%)           | 2 (100%)    | 2 (100%)          | 2 (100%)    | 0 (0%)              |
