# Supplementary material for: Overlapping ETS and CRE Motifs (G/CCGGAAGTGACGTCA) Preferentially Bound by GABPα and CREB Proteins
Source: PubMed Central journal article supplement (PMC3464117; doi:10.1534/g3.112.004002), 2012-10-01
Supplement: supp_2.10.1243_TableS3.pdf [file supp_2.10.1243_TableS3.pdf]

**Table S3 Enriched GO terms (P<0.05) for the human genes that have one of the 4 ETS↔CRE 12-mer or 13-mers (<sup>C</sup>/<sub>6</sub>CGGAAGTGACG<sup>T</sup>/<sub>C</sub>) in promoters.** There are no enriched GO terms with P-value <0.05 for the genes with <sup>C</sup>/<sub>6</sub>CGGAAGTGACGC in their promoters.

| Motif   | Sequence              | GO Term    | Description                                                  | Count | Backgr<br>ound<br>count | P-<br>Value |
|---------|-----------------------|------------|--------------------------------------------------------------|-------|-------------------------|-------------|
| ETS↔CRE | 12-mer: CGGAAGTGACGC  | GO:0006281 | DNA repair                                                   | 5     | 284                     | 8.8E-03     |
|         |                       | GO:0016567 | protein ubiquitination                                       | 5     | 119                     | 1.3E-03     |
|         | 12-mer: CGGAAGTGACGT  | GO:0032446 | protein modification by small protein conjugation            | 5     | 132                     | 1.9E-03     |
|         |                       | GO:0070647 | protein modification by small protein conjugation or removal | 5     | 160                     | 3.8E-03     |
|         |                       | GO:0044265 | cellular macromolecule catabolic process                     | 9     | 725                     | 7.6E-03     |
|         |                       | GO:0009057 | macromolecule catabolic process                              | 9     | 781                     | 1.2E-02     |
|         |                       | GO:0006396 | RNA processing                                               | 9     | 547                     | 1.4E-03     |
|         |                       | GO:0006397 | mRNA processing                                              | 6     | 321                     | 8.9E-03     |
|         | 13-mer: GCGGAAGTGACGT | GO:0051276 | chromosome organization                                      | 5     | 485                     | 6.0E-03     |
|         |                       | GO:0045449 | regulation of transcription                                  | 13    | 2601                    | 1.3E-04     |
|         | 13-mer: CCGGAAGTGACGT | GO:0016567 | protein ubiquitination                                       | 3     | 119                     | 1.4E-02     |
