# Supplementary material for: Overlapping ETS and CRE Motifs (G/CCGGAAGTGACGTCA) Preferentially Bound by GABPα and CREB Proteins
Source: PubMed Central journal article supplement (PMC3464117; doi:10.1534/g3.112.004002), 2012-10-01
Supplement: supp_2.10.1243_TableS4.pdf [file supp_2.10.1243_TableS4.pdf]

**Table S4 Occurrence of unmethylated versions of the ETS↔CRE motifs in the mouse genome with 24,273 promoters and proximal promoters and 16,026 CpG Islands.** Unmethylated occurrences are presented in parenthesis.

| Motifs                                | N-mers | DNA sequence    | Whole Genome<br>(# Unmethylated) | Promoter<br>(#Unmethylated) | Proximal Promoter<br>(#Unmethylated) | CpG Islands<br>(#Unmethylated)<br>(0.34%) |
|---------------------------------------|--------|-----------------|----------------------------------|-----------------------------|--------------------------------------|-------------------------------------------|
|                                       |        |                 | (100%)                           | (-1000...500)<br>(1.18%)    | (-200...60) (0.19%)                  |                                           |
| ETS                                   | 8-mer  | CCGGAAGT        | 16346 (2350)                     | 1261 (990)                  | 704 (643)                            | 1362 (1286)                               |
| CRE                                   | 8-mer  | TGACGTCA        | 14297 (1561)                     | 578 (432)                   | 315 (268)                            | 599 (569)                                 |
| ETS↔CRE                               | 12-mer | CGGAAGTGACGT    | 89 (67)                          | 37 (36)                     | 31 (31)                              | 60 (60)                                   |
| ETS↔CRE                               | 12-mer | CGGAAGTGACGC    | 82 (68)                          | 35 (35)                     | 33 (33)                              | 68 (67)                                   |
| ETS↔CRE                               | 13-mer | GCGGAAGTGACGT   | 21 (21)                          | 10 (10)                     | 7 (7)                                | 19 (19)                                   |
| ETS↔CRE                               | 13-mer | GCGGAAGTGACGC   | 28 (25)                          | 15 (15)                     | 13 (13)                              | 26 (25)                                   |
| ETS↔CRE                               | 13-mer | CCGGAAGTGACGT   | 45 (34)                          | 21 (20)                     | 18 (18)                              | 29 (29)                                   |
| ETS↔CRE                               | 13-mer | CCGGAAGTGACGC   | 42 (36)                          | 22 (22)                     | 17 (17)                              | 35 (35)                                   |
| ETS↔CRE                               | 15-mer | CCGGAAGTGACGTCA | 12 (8)                           | 8 (7)                       | 7 (7)                                | 7 (7)                                     |
| N-CG-N <sub>7</sub> -CG               | 12-mer | ACGCACACACCG    | 42 (8)                           | 3 (3)                       | 5 (4)                                | 0 (0)                                     |
| N <sub>2</sub> -CG-N <sub>7</sub> -CG | 13-mer | CACGCACACACCG   | 32 (4)                           | 2 (2)                       | 3 (2)                                | 0 (0)                                     |
